# Supplementary material for: Impact of Achieving Blood Pressure Targets and High Time in Therapeutic Range on Clinical Outcomes in Patients With Atrial Fibrillation Adherent to the Atrial Fibrillation Better Care Pathway: A Report From the COOL‐AF Registry
Source: PubMed Central journal article supplement — J Am Heart Assoc. 2023 Jan 25;12(3):e028463. doi: 10.1161/JAHA.122.028463 (PMC9973618; doi:10.1161/jaha.122.028463), 2023-01-25

# **SUPPLEMENTAL MATERIAL**

**Table S1.** Number and proportion of patients with ABC compliant – to be removed

| <b>ABC - groups</b> | <b>N (%)</b> |
|---------------------|--------------|
| - A compliant       | 2561 (77.9%) |
| - A not compliant   | 754 (22.1%)  |
| - B compliant       | 2608 (76.6%) |
| - B not compliant   | 797 (23.4%)  |
| - C compliant       | 2345 (68.9%) |
| - C not compliant   | 1060 (31.1%) |
| - ABC compliant     | 1453 (42.7%) |
| - ABC not compliant | 1952 (57.3%) |

**Table S2.** Incidence rate of clinical outcome according to ABC compliance status

| <b>ABC groups</b>          | <b>Number of patients</b> | <b>Number of events</b> | <b>100 person-years</b> | <b>Rate per 100 person-years</b> |
|----------------------------|---------------------------|-------------------------|-------------------------|----------------------------------|
| <b>All-cause death/SSE</b> | <b>3405</b>               | <b>467</b>              | <b>88.24</b>            | <b>5.29</b>                      |
| - A compliant              | 2651                      | 356                     | 68.90                   | 5.17                             |
| - A not compliant          | 754                       | 111                     | 19.34                   | 5.74                             |
| - B compliant              | 2608                      | 293                     | 68.25                   | 4.29                             |
| - B not compliant          | 797                       | 174                     | 19.99                   | 8.70                             |
| - C compliant              | 2345                      | 282                     | 61.36                   | 4.60                             |
| - C not compliant          | 1060                      | 185                     | 26.88                   | 6.88                             |
| - ABC compliant            | 1453                      | 144                     | 38.19                   | 3.77                             |
| - ABC not compliant        | 1952                      | 323                     | 50.06                   | 6.45                             |
| <b>All-cause death</b>     | <b>3405</b>               | <b>380</b>              | <b>90.27</b>            | <b>4.21</b>                      |
| - A compliant              | 2651                      | 300                     | 70.30                   | 4.27                             |
| - A not compliant          | 754                       | 80                      | 19.97                   | 4.01                             |
| - B compliant              | 2608                      | 232                     | 69.72                   | 3.33                             |
| - B not compliant          | 797                       | 148                     | 20.55                   | 7.20                             |
| - C compliant              | 2345                      | 229                     | 62.74                   | 3.65                             |
| - C not compliant          | 1060                      | 151                     | 27.53                   | 5.49                             |
| - ABC compliant            | 1453                      | 118                     | 38.97                   | 3.03                             |
| - ABC not compliant        | 1952                      | 262                     | 51.30                   | 5.11                             |
| <b>SSE</b>                 | <b>3405</b>               | <b>134</b>              | <b>88.99</b>            | <b>1.51</b>                      |
| - A compliant              | 2651                      | 95                      | 69.48                   | 1.37                             |
| - A not compliant          | 754                       | 39                      | 19.51                   | 2.00                             |
| - B compliant              | 2608                      | 91                      | 68.83                   | 1.32                             |
| - B not compliant          | 797                       | 43                      | 20.16                   | 2.13                             |
| - C compliant              | 2345                      | 82                      | 61.89                   | 1.33                             |
| - C not compliant          | 1060                      | 52                      | 27.11                   | 1.92                             |
| - ABC compliant            | 1453                      | 45                      | 38.51                   | 1.17                             |
| - ABC not compliant        | 1952                      | 89                      | 50.48                   | 1.76                             |
| <b>Major bleeding</b>      | <b>3405</b>               | <b>199</b>              | <b>88.36</b>            | <b>2.25</b>                      |

|                      |             |            |              |             |
|----------------------|-------------|------------|--------------|-------------|
| - A compliant        | 2651        | 170        | 68.58        | 2.48        |
| - A not compliant    | 754         | 29         | 19.77        | 1.47        |
| - B compliant        | 2608        | 150        | 68.11        | 2.20        |
| - B not compliant    | 797         | 49         | 20.25        | 2.42        |
| - C compliant        | 2345        | 133        | 61.40        | 2.17        |
| - C not compliant    | 1060        | 66         | 26.96        | 2.45        |
| - ABC compliant      | 1453        | 80         | 38.03        | 2.10        |
| - ABC not compliant  | 1952        | 119        | 50.33        | 2.36        |
| <b>ICH</b>           | <b>3405</b> | <b>70</b>  | <b>89.85</b> | <b>0.78</b> |
| - A compliant        | 2651        | 62         | 69.91        | 0.89        |
| - A not compliant    | 754         | 8          | 19.94        | 0.40        |
| - B compliant        | 2608        | 48         | 69.40        | 0.69        |
| - B not compliant    | 797         | 22         | 20.45        | 1.08        |
| - C compliant        | 2345        | 48         | 62.43        | 0.77        |
| - C not compliant    | 1060        | 22         | 27.42        | 0.80        |
| - ABC compliant      | 1453        | 25         | 38.77        | 0.64        |
| - ABC not compliant  | 1952        | 45         | 51.08        | 0.88        |
| <b>Heart failure</b> | <b>3405</b> | <b>247</b> | <b>87.08</b> | <b>2.84</b> |
| - A compliant        | 2651        | 196        | 67.72        | 2.89        |
| - A not compliant    | 754         | 51         | 19.36        | 2.63        |
| - B compliant        | 2608        | 152        | 67.89        | 2.24        |
| - B not compliant    | 797         | 95         | 19.19        | 4.95        |
| - C compliant        | 2345        | 139        | 60.99        | 2.28        |
| - C not compliant    | 1060        | 108        | 26.09        | 4.14        |
| - ABC compliant      | 1453        | 64         | 38.26        | 1.67        |
| - ABC not compliant  | 1952        | 183        | 48.82        | 3.75        |

SSE = ischemic stroke/systemic embolism, ICH = intracranial hemorrhage

**Table S3.** Baseline characteristics of study population with systole blood pressure (SBP) target and not target.

| Characteristics                              | All<br>(N=3,405) | SBP target<br>(n=1,427) | SBP not target<br>(n=1,978) | p-value          |
|----------------------------------------------|------------------|-------------------------|-----------------------------|------------------|
| Age (years)                                  | 67.8±11.3        | 67.6±10.9               | 68±11.5                     | 0.316            |
| Female gender                                | 1,424 (41.8%)    | 589 (41.3%)             | 835 (42.2%)                 | 0.584            |
| BMI (kg/m <sup>2</sup> )                     | 25.2±4.7         | 25.5±4.8                | 24.9±4.6                    | <b>&lt;0.001</b> |
| SBP (mmHg)                                   | 128.5±18.4       | 129.5±5.7               | 127.7±23.7                  | <b>0.001</b>     |
| DBP (mmHg)                                   | 75.2±12.7        | 76.6±10.7               | 74.2±13.8                   | <b>&lt;0.001</b> |
| Pulse (bpm)                                  | 77.4±16.2        | 77.5±15.5               | 77.3±16.7                   | 0.723            |
| Time after diagnosis of AF (years)           | 3.4±4.3          | 3.5±4.1                 | 3.3±4.5                     | 0.324            |
| Atrial fibrillation                          |                  |                         |                             | 0.045            |
| - Paroxysmal                                 | 1,148 (33.7%)    | 481 (33.7%)             | 667 (33.7%)                 |                  |
| - Persistent                                 | 645 (18.9%)      | 244 (17.1%)             | 401 (20.3%)                 |                  |
| - Permanent                                  | 1,612 (47.3%)    | 702 (49.2%)             | 910 (46.0%)                 |                  |
| Symptomatic AF                               | 2,620 (76.9%)    | 1,100 (77.1%)           | 1,520 (76.8%)               | 0.870            |
| History of heart failure                     | 913 (26.8%)      | 344 (24.1%)             | 569 (28.8%)                 | <b>0.002</b>     |
| History of CAD                               | 547 (16.1%)      | 214 (15.0%)             | 333 (16.8%)                 | 0.149            |
| CIED                                         | 341 (10.0%)      | 117 (8.2%)              | 224 (11.3%)                 | <b>0.003</b>     |
| History of ischemic stroke/TIA               | 592 (17.4%)      | 239 (16.7%)             | 353 (17.8%)                 | 0.404            |
| Diabetes mellitus                            | 839 (24.6%)      | 370 (25.9%)             | 469 (23.7%)                 | 0.138            |
| Hypertension                                 | 2,330 (68.4%)    | 1,002 (70.2%)           | 1,328 (67.1%)               | 0.057            |
| Smoking                                      | 678 (19.9%)      | 290 (20.3%)             | 388 (19.6%)                 | 0.610            |
| Dyslipidemia                                 | 1,917 (56.3%)    | 839 (58.8%)             | 1,078 (54.5%)               | <b>0.013</b>     |
| Renal replacement therapy                    | 40 (1.2%)        | 16 (1.1%)               | 24 (1.2%)                   | 0.806            |
| Dementia                                     | 29 (0.9%)        | 16 (1.1%)               | 13 (0.7%)                   | 0.146            |
| Systemic embolism                            | 25 (0.7%)        | 7 (0.5%)                | 18 (0.9%)                   | 0.157            |
| History of peripheral vascular disease       | 44 (1.3%)        | 17 (1.2%)               | 27 (1.4%)                   | 0.658            |
| History of carotid occlusive disease         | 8 (0.2%)         | 3 (0.2%)                | 5 (0.3%)                    | 0.800            |
| History of stent use                         | 253 (7.4%)       | 96 (6.7%)               | 157 (7.9%)                  | 0.184            |
| History of CABG                              | 65 (1.9%)        | 26 (1.8%)               | 39 (2.0%)                   | 0.753            |
| History of alcohol abuse,                    | 140 (4.1%)       | 55 (3.9%)               | 85 (4.3%)                   | 0.521            |
| History of bleeding                          | 324 (9.5%)       | 138 (9.7%)              | 186 (9.4%)                  | 0.793            |
| CKD                                          | 1,756 (51.6%)    | 710 (49.8%)             | 1,046 (52.9%)               | 0.072            |
| Anemia                                       | 1,293 (38.0%)    | 530 (37.1%)             | 763 (38.6%)                 | 0.395            |
| LVEF                                         | 60.2±13.7        | 61±13.2                 | 59.6±14.1                   | <b>0.002</b>     |
| CHA <sub>2</sub> DS <sub>2</sub> -VASc score |                  |                         |                             | 0.765            |
| - Low risk                                   | 287 (8.4%)       | 126 (8.8%)              | 161 (8.1%)                  |                  |
| - Intermediate risk                          | 548 (16.1%)      | 227 (15.9%)             | 321 (16.2%)                 |                  |
| - High risk                                  | 2,570 (75.5%)    | 1,074 (75.3%)           | 1,496 (75.6%)               |                  |
| HAS-BLED score                               |                  |                         |                             | 0.312            |

|                       |               |               |               |                  |
|-----------------------|---------------|---------------|---------------|------------------|
| - 0                   | 490 (14.4%)   | 220 (15.4%)   | 270 (13.7%)   |                  |
| - 1-2                 | 1,255 (36.9%) | 526 (36.9%)   | 729 (36.9%)   |                  |
| - ≥3                  | 1,660 (48.8%) | 681 (47.7%)   | 979 (49.5%)   |                  |
| Antiplatelet          | 892 (26.2%)   | 359 (25.2%)   | 533 (26.9%)   | 0.241            |
| Anticoagulant         | 2,568 (75.4%) | 1,092 (76.5%) | 1,476 (74.6%) | 0.203            |
| - Warfarin            | 2,340 (68.7%) | 994 (69.7%)   | 1,346 (68.0%) | 0.318            |
| - NOACs               | 228 (6.7%)    | 98 (6.9%)     | 130 (6.6%)    | 0.734            |
| Beta blocker          | 2,477 (72.7%) | 1,032 (72.3%) | 1,445 (73.1%) | 0.635            |
| CCB                   | 935 (27.5%)   | 429 (30.1%)   | 506 (25.6%)   | <b>0.004</b>     |
| Digitalis             | 539 (15.8%)   | 230 (16.1%)   | 309 (15.6%)   | 0.696            |
| MRA                   | 280 (8.2%)    | 83 (5.8%)     | 197 (10.0%)   | <b>&lt;0.001</b> |
| Statin                | 2,014 (59.1%) | 855 (59.9%)   | 1,159 (58.6%) | 0.439            |
| ACEI/ARB              | 1,557 (45.7%) | 624 (43.7%)   | 933 (47.2%)   | <b>0.047</b>     |
| NSAID/Cox-2 inhibitor | 83 (2.4%)     | 32 (2.2%)     | 51 (2.6%)     | 0.531            |

---

**Table S4.** Baseline characteristics of study population with time in therapeutic range (TTR) < and ≥65%.

| Characteristics                              | All<br>(N=2,233) | TTR <65%<br>(n=1,432) | TTR ≥65%<br>(n=801) | p-value          |
|----------------------------------------------|------------------|-----------------------|---------------------|------------------|
| Age (years)                                  | 68.9±10.6        | 69±10.5               | 68.6±10.6           | 0.437            |
| Female gender                                | 980 (43.9%)      | 629 (43.9%)           | 351 (43.8%)         | 0.962            |
| BMI (kg/m <sup>2</sup> )                     | 25.3±4.8         | 25.1±4.9              | 25.5±4.6            | 0.080            |
| SBP (mmHg)                                   | 128.1±18         | 128.3±18              | 127.7±18            | 0.483            |
| DBP (mmHg)                                   | 75±12.5          | 74.9±12.3             | 75.1±12.9           | 0.784            |
| Pulse (bpm)                                  | 77.4±16.2        | 77.8±16.3             | 76.6±16             | 0.103            |
| Time after diagnosis of AF (years)           | 3.6±4.4          | 3.4±4.2               | 3.8±4.7             | <b>0.039</b>     |
| Atrial fibrillation                          |                  |                       |                     | 0.085            |
| - Paroxysmal                                 | 631 (28.3%)      | 382 (26.7%)           | 249 (31.1%)         |                  |
| - Persistent                                 | 421 (18.9%)      | 276 (19.3%)           | 145 (18.1%)         |                  |
| - Permanent                                  | 1181 (52.9%)     | 774 (54.1%)           | 407 (50.8%)         |                  |
| Symptomatic AF                               | 1720 (77%)       | 1128 (78.8%)          | 592 (73.9%)         | <b>0.009</b>     |
| History of heart failure                     | 628 (28.1%)      | 436 (30.4%)           | 192 (24%)           | <b>0.001</b>     |
| History of CAD                               | 356 (15.9%)      | 232 (16.2%)           | 124 (15.5%)         | 0.656            |
| CIED                                         | 216 (9.7%)       | 114 (8%)              | 102 (12.7%)         | <b>&lt;0.001</b> |
| History of ischemic stroke/TIA               | 485 (21.7%)      | 292 (20.4%)           | 193 (24.1%)         | <b>0.042</b>     |
| Diabetes mellitus                            | 610 (27.3%)      | 426 (29.7%)           | 184 (23%)           | <b>0.001</b>     |
| Hypertension                                 | 1641 (73.5%)     | 1067 (74.5%)          | 574 (71.7%)         | 0.143            |
| Smoking                                      | 414 (18.5%)      | 262 (18.3%)           | 152 (19%)           | 0.692            |
| Dyslipidemia                                 | 1320 (59.1%)     | 835 (58.3%)           | 485 (60.5%)         | 0.302            |
| Renal replacement therapy                    | 20 (0.9%)        | 15 (1%)               | 5 (0.6%)            | 0.309            |
| Dementia                                     | 20 (0.9%)        | 12 (0.8%)             | 8 (1%)              | 0.699            |
| Systemic embolism                            | 22 (1%)          | 11 (0.8%)             | 11 (1.4%)           | 0.165            |
| History of peripheral vascular disease       | 29 (1.3%)        | 17 (1.2%)             | 12 (1.5%)           | 0.534            |
| History of carotid occlusive disease         | 8 (0.4%)         | 5 (0.3%)              | 3 (0.4%)            | 0.923            |
| History of stent use                         | 158 (7.1%)       | 103 (7.2%)            | 55 (6.9%)           | 0.773            |
| History of CABG                              | 49 (2.2%)        | 31 (2.2%)             | 18 (2.2%)           | 0.899            |
| History of alcohol abuse,                    | 73 (3.3%)        | 51 (3.6%)             | 22 (2.7%)           | 0.299            |
| History of bleeding                          | 241 (10.8%)      | 168 (11.7%)           | 73 (9.1%)           | 0.056            |
| CKD                                          | 1226 (54.9%)     | 805 (56.2%)           | 421 (52.6%)         | 0.096            |
| Anemia                                       | 899 (40.3%)      | 614 (42.9%)           | 285 (35.6%)         | <b>0.001</b>     |
| LVEF                                         | 59.7±14.2        | 59.2±14.5             | 60.5±13.5           | <b>0.036</b>     |
| CHA <sub>2</sub> DS <sub>2</sub> -VASc score |                  |                       |                     | 0.051            |
| - Low risk                                   | 77 (3.4%)        | 40 (2.8%)             | 37 (4.6%)           |                  |
| - Intermediate risk                          | 294 (13.2%)      | 183 (12.8%)           | 111 (13.9%)         |                  |
| - High risk                                  | 1862 (83.4%)     | 1209 (84.4%)          | 653 (81.5%)         |                  |
| HAS-BLED score                               |                  |                       |                     | <b>0.039</b>     |

|                       |              |              |             |       |
|-----------------------|--------------|--------------|-------------|-------|
| - 0                   | 271 (12.1%)  | 165 (11.5%)  | 106 (13.2%) |       |
| - 1-2                 | 845 (37.8%)  | 522 (36.5%)  | 323 (40.3%) |       |
| - ≥3                  | 1117 (50%)   | 745 (52%)    | 372 (46.4%) |       |
| Antiplatelet          | 277 (12.4%)  | 191 (13.3%)  | 86 (10.7%)  | 0.074 |
| Anticoagulant         | 2233 (100%)  | 1432 (100%)  | 801 (100%)  | -     |
| - Warfarin            | 2233 (100%)  | 1432 (100%)  | 801 (100%)  | -     |
| - NOACs               | 0 (0.0%)     | 0 (0.0%)     | 0 (0.0%)    | -     |
| Beta blocker          | 1645 (73.7%) | 1053 (73.5%) | 592 (73.9%) | 0.847 |
| CCB                   | 659 (29.5%)  | 426 (29.7%)  | 233 (29.1%) | 0.743 |
| Digitalis             | 371 (16.6%)  | 245 (17.1%)  | 126 (15.7%) | 0.401 |
| MRA                   | 203 (9.1%)   | 137 (9.6%)   | 66 (8.2%)   | 0.295 |
| Statin                | 1398 (62.6%) | 882 (61.6%)  | 516 (64.4%) | 0.185 |
| ACEI/ARB              | 1115 (49.9%) | 717 (50.1%)  | 398 (49.7%) | 0.863 |
| NSAID/Cox-2 inhibitor | 37 (1.7%)    | 23 (1.6%)    | 14 (1.7%)   | 0.801 |

---



**Figure S1.** Comparison of incidence rate of clinical outcomes between patients who were ABC pathway compliant and not compliant (SSE = ischemic stroke/systemic embolism, ICH = intracranial hemorrhage)

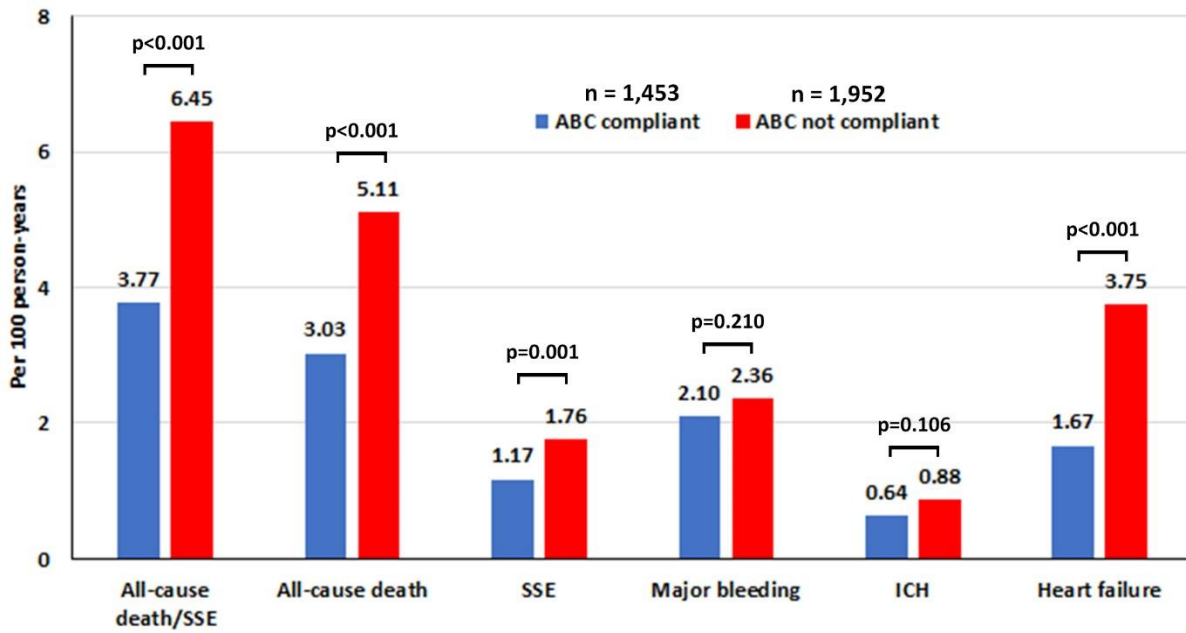

**Figure S2.** Bar graphs of comparisons of incidence rate of clinical outcomes stratified by the 3 groups of ABC compliant status

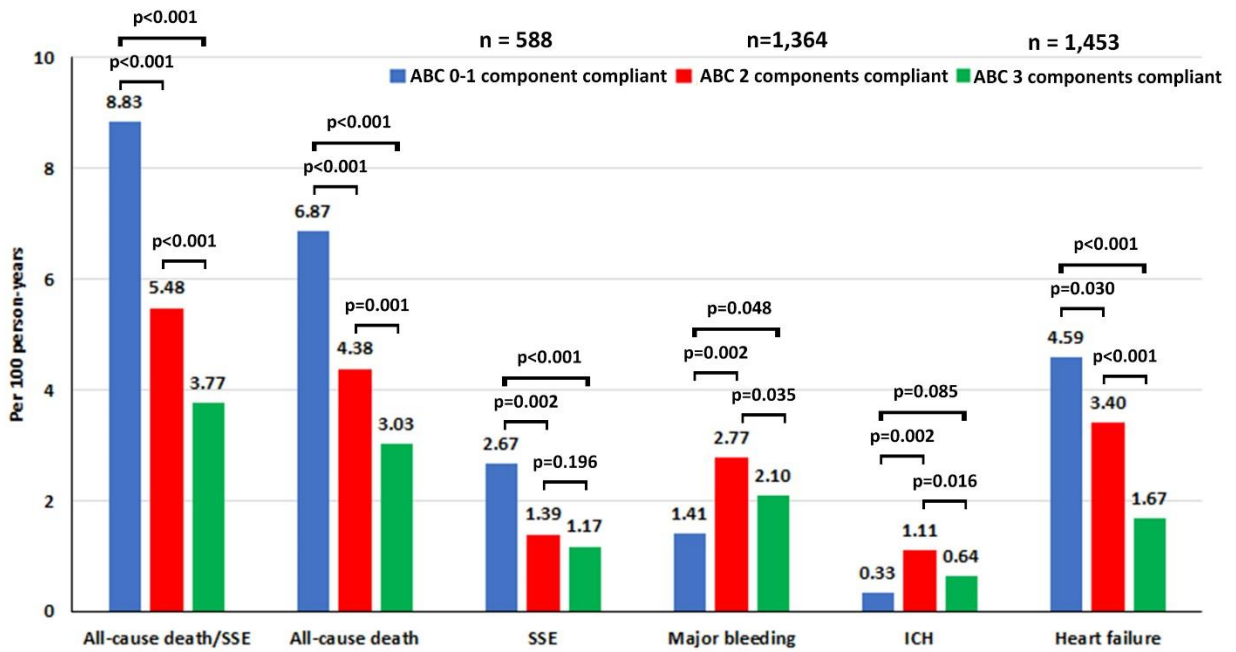

**Figure S3.** Forest plot of unadjusted and adjusted hazard ratio of 3 groups of ABC pathway compliant status and clinical outcomes

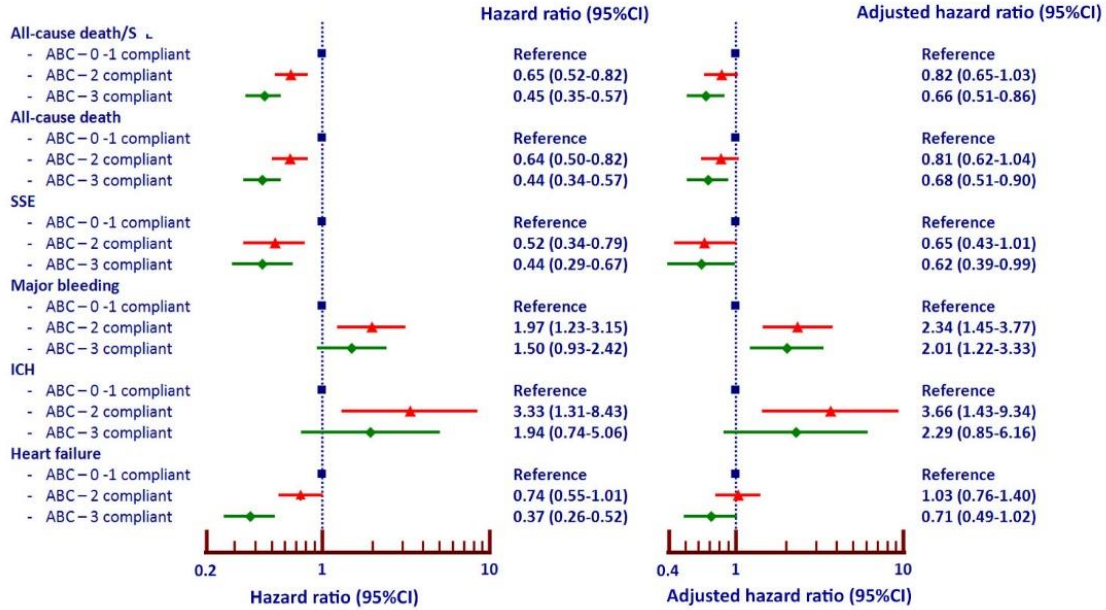

Supplement: JAH3-12-e028463-s001.pdf [file JAH3-12-e028463-s001.pdf]
